# Supplementary material for: Effect of alkyl chain length on piezochromic luminescence of iridium(iii)-based phosphors adopting 2-phenyl-1H-benzoimidazole type ligands
Source: Royal Society of Chemistry journal article supplement (doi:10.1039/c4tc00993b), 2014-01-01
Supplement: c4tc00993b1.pdf [file c4tc00993b1.pdf]

**Supporting Information for**

**Alkyl chain length effects on piezochromic luminescence of  
iridium(III)-based phosphors adopting 2-phenyl-1*H*-  
benzoimidazole type ligands**

Yi Han,<sup>a</sup> Hong-Tao Cao,<sup>a</sup> Hai-Zhu Sun,<sup>a</sup> Yong Wu,<sup>a</sup> Guo-Gang Shan,<sup>a\*</sup> Zhong-Min Su,<sup>a\*</sup> Xue-Gang Hou<sup>a</sup> and Yi Liao<sup>b\*</sup>

<sup>a</sup> Institute of Functional Material Chemistry, Faculty of Chemistry, Northeast Normal University, Changchun, Jilin, 130024, P. R. China.

<sup>b</sup> Department of Chemistry, Capital Normal University, Beijing, 10000, P. R. China.

---

\*To whom correspondence should be addressed. E-mail: [shangg187@nenu.edu.cn](mailto:shangg187@nenu.edu.cn) (G. S.); [zmsu@nenu.edu.cn](mailto:zmsu@nenu.edu.cn) (Z. M. S.); [liaoy271@nenu.edu.cn](mailto:liaoy271@nenu.edu.cn) (Y. L.)

Fax: +86-431-85684009, Tel.: +86-431-85099108

### Theoretical calculations

Calculation on the ground and excited electronic state of complexes were investigated by performing DFT and TD-DFT at PBE0 level. The 6-31G\* basis sets were employed for optimizing the C, H, N atoms and the LANL2DZ basis sets for Ir atom. An effective core potential (ECP) replaces the inner core electrons of iridium leaving the outer core  $(5s)^2(5p)^6$  electrons and the  $(5d)^6$  valence electrons of Ir(III). The geometry of the triplet states ( $T_1$ ) was fully optimized and was calculated at the spin-unrestricted UPBE1PBE level with a spin multiplicity of 3. All expected values calculated for  $S^2$  were smaller than 2.05. All calculations reported here were carried out with the Gaussian 09 software package.<sup>1</sup>

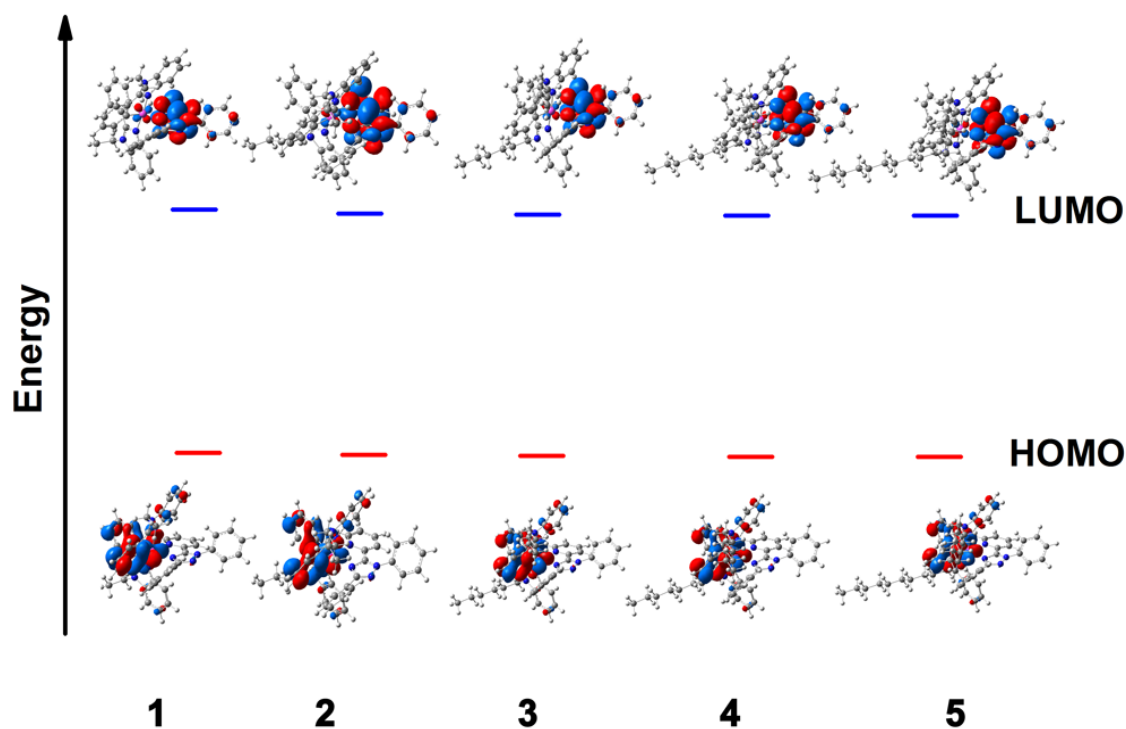

Fig. S1 HOMO and LUMO distributions of complexes **1–5**.

**Table S1** Calculated energy levels of the lower-lying transitions of complexes **1–5**.

| Complex  | States         | Assignment | eV   | <i>f</i> | Nature                               |
|----------|----------------|------------|------|----------|--------------------------------------|
| <b>1</b> | T <sub>1</sub> | H→L (88%)  | 2.27 | 0        | <sup>3</sup> MLCT/ <sup>3</sup> LLCT |
| <b>2</b> | T <sub>1</sub> | H→L (88%)  | 2.27 | 0        | <sup>3</sup> MLCT/ <sup>3</sup> LLCT |
| <b>3</b> | T <sub>1</sub> | H→L (87%)  | 2.27 | 0        | <sup>3</sup> MLCT/ <sup>3</sup> LLCT |
| <b>4</b> | T <sub>1</sub> | H→L (88%)  | 2.27 | 0        | <sup>3</sup> MLCT/ <sup>3</sup> LLCT |
| <b>5</b> | T <sub>1</sub> | H→L (88%)  | 2.27 | 0        | <sup>3</sup> MLCT/ <sup>3</sup> LLCT |

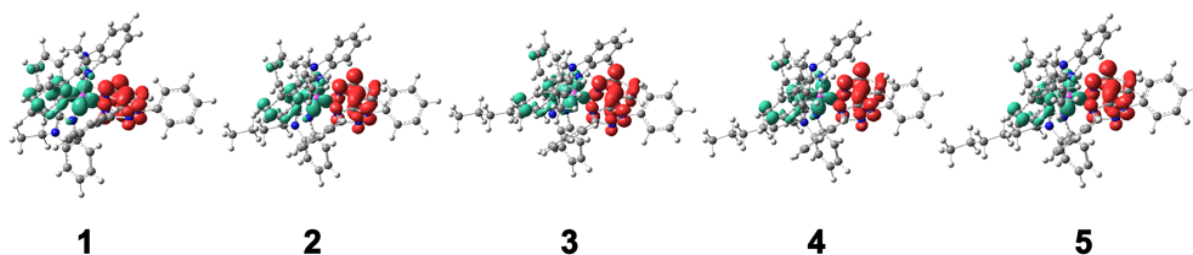**Fig. S2** Difference electron density computed by subtracting the electron densities of the T<sub>1</sub> and S<sub>0</sub> states for complex **1–5**. The charge goes from the green to the red areas.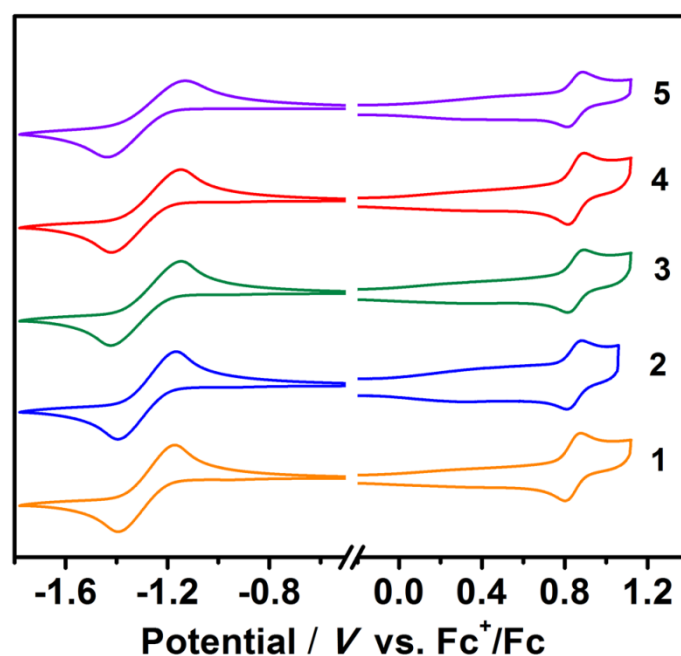**Fig. S3** Cyclic voltammograms of complexes **1–5** in CH<sub>3</sub>CN solutions. Potentials were recorded versus Fc<sup>+</sup>/Fc (Fc is ferrocene).

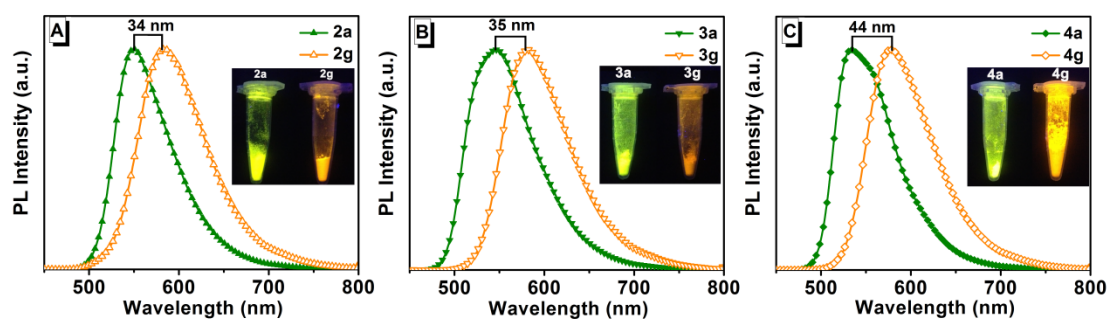

**Fig. S4** Emission spectra of as-synthesized powders and ground samples for complexes **1** (A), **2** (B) and **3** (C) at room temperature (RT).

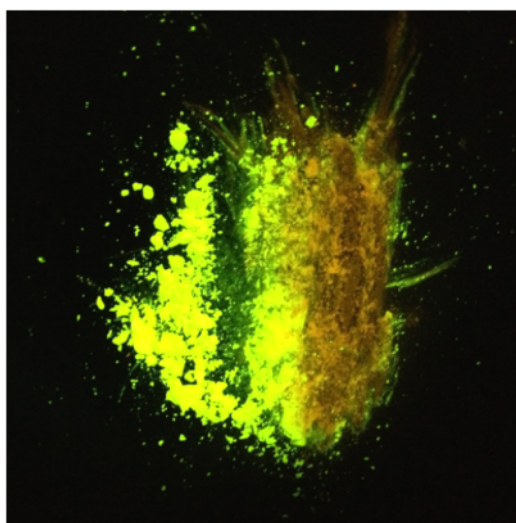

**Fig. S5** Image of complex **5** powder after grinding the right-half with a pestle under UV irradiation.

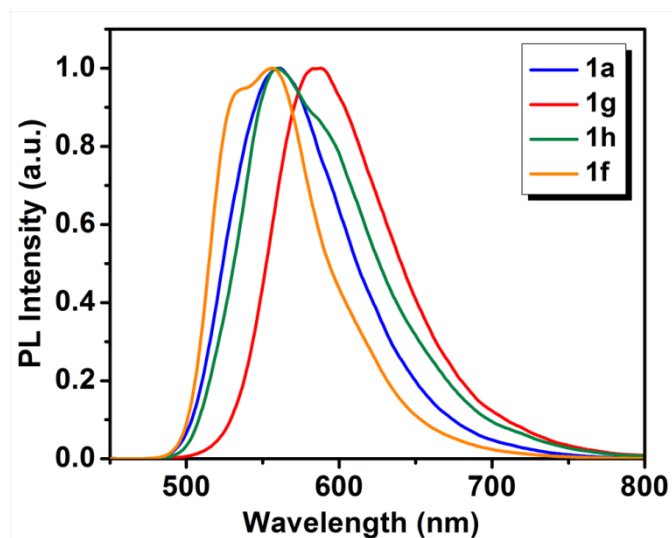

**Fig. S6** Normalized emission spectra of as-synthesized powder for complex **1** (**1a**), upon grinding (**1g**), annealing (**1h**) and solvent-fuming (**1f**).

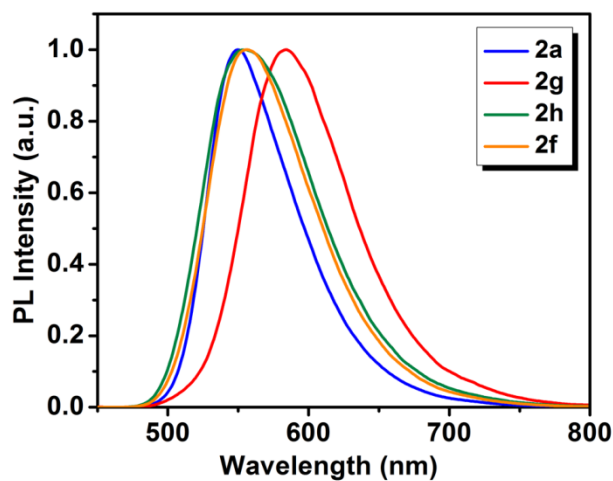

**Fig. S7** Normalized emission spectra of as-synthesized powder for complex **2** (**2a**), upon grinding (**2g**), annealing (**2h**) and solvent-fuming (**2f**).

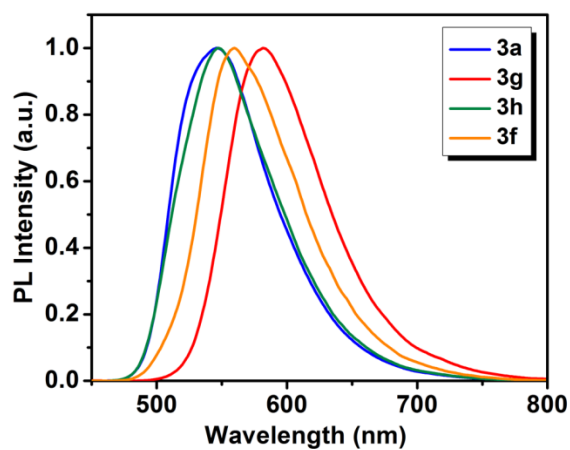

**Fig. S8** Normalized emission spectra of as-synthesized powder for complex **3** (**3a**), upon grinding (**3g**), annealing (**3h**) and solvent-fuming (**3f**).

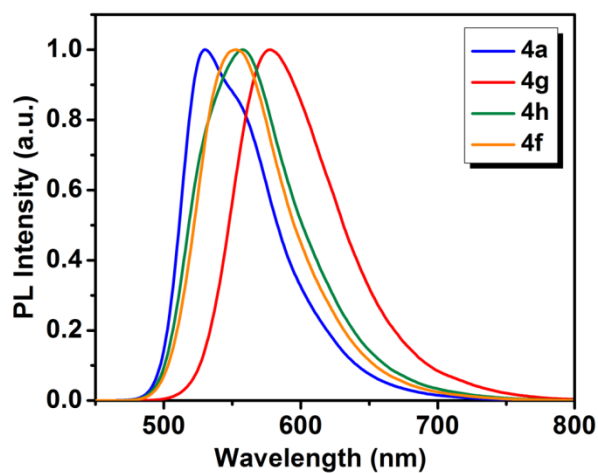

**Fig. S9** Normalized emission spectra of as-synthesized powder for complex **4** (**4a**), upon grinding (**4g**), annealing (**4h**) and solvent-fuming (**4f**).

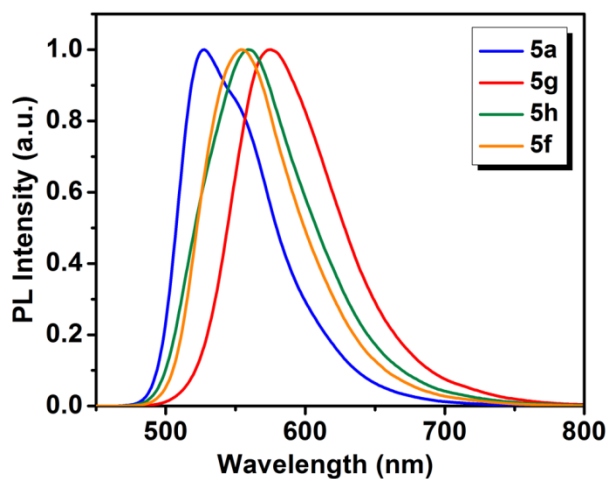

**Fig. S10** Normalized emission spectra of as-synthesized powder for complex **5** (**5a**), upon grinding (**5g**), annealing (**5h**) and solvent-fuming (**5f**).

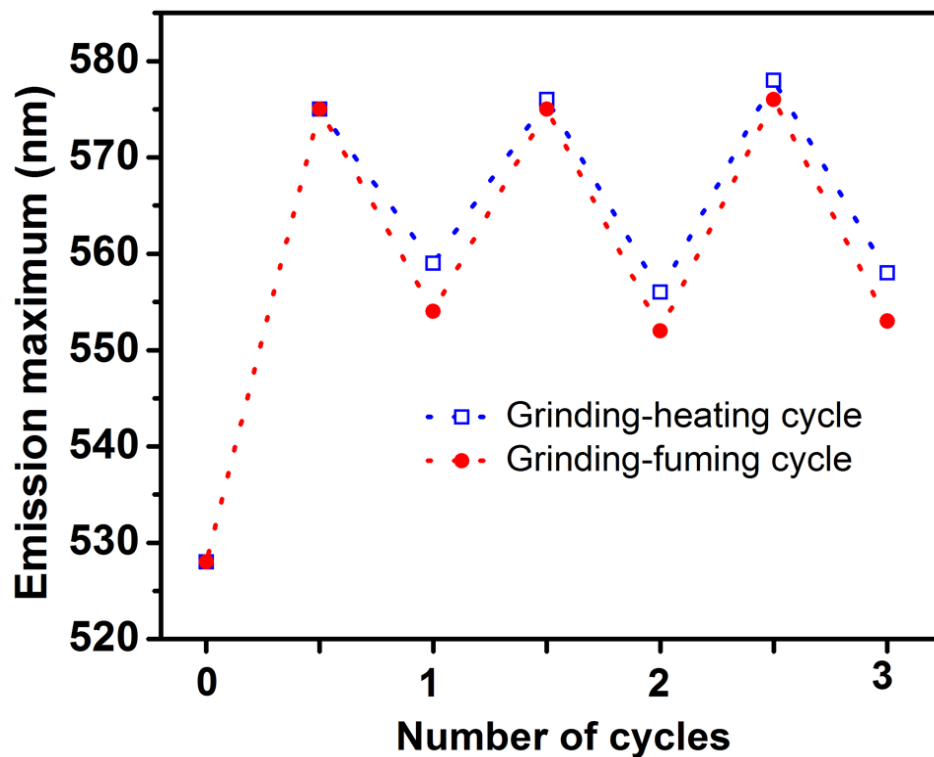

Fig. S11 Reversible switching of emission maximum of complex 5 by repeated grinding-heating (□) or grinding-fuming (●) cycle.

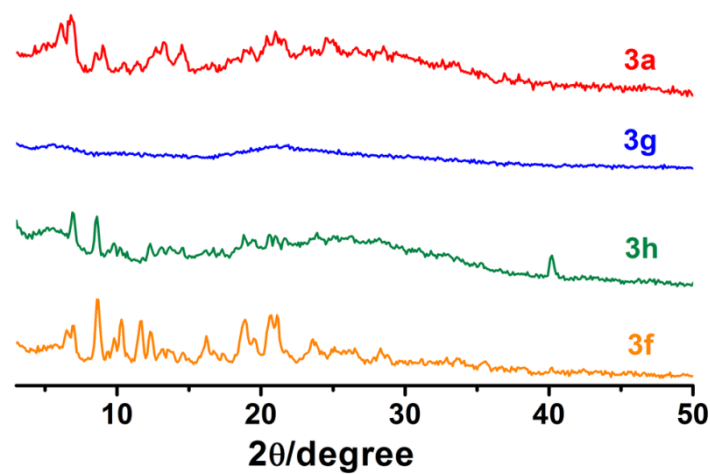

Fig. S12 PXRD curves of complex 3 in different states. The letter “a”, “g” “h” and “f” represent as-synthesized powder, ground sample, heated sample and solvent-fumed sample, respectively.

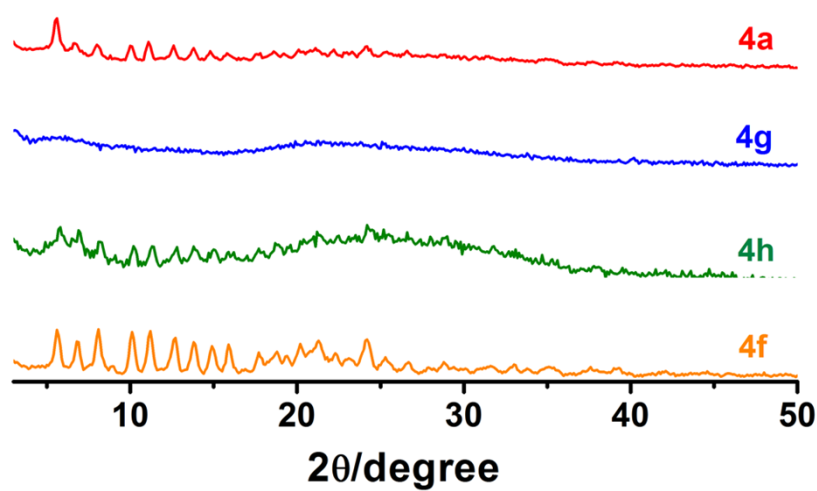

Fig. S13 PXRD curves of complex 4 in different states.

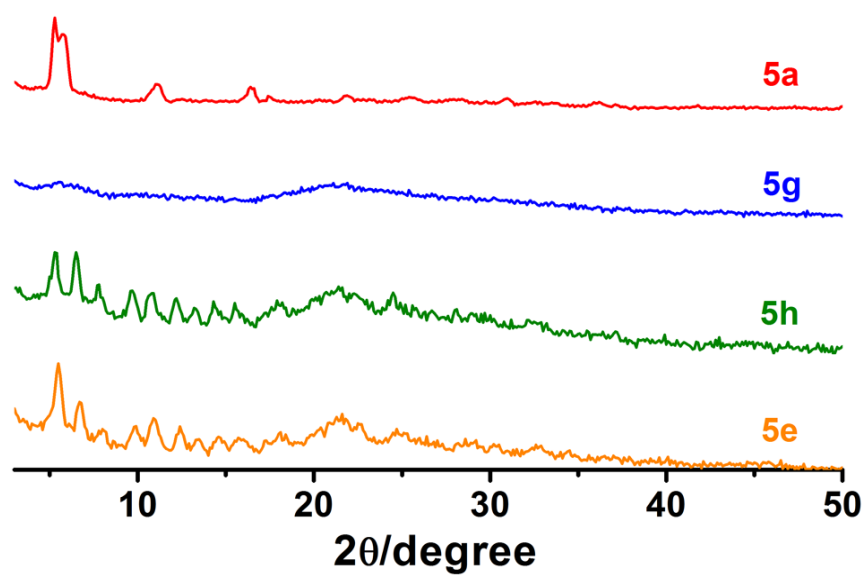

Fig. S14 PXRD curves of complex 5 in different states.
